# Supplementary material for: Assessment of medical waste generation, associated environmental impact, and management issues after the outbreak of COVID-19: A case study of the Hubei Province in China
Source: PubMed Central journal article supplement (PMC8786120; doi:10.1371/journal.pone.0259207), 2022-01-24
Supplement: pone.0259207.s002.pdf [file pone.0259207.s002.pdf]

### **Confirmation of reordering authorship**

The authors agreed on the change of author order: Jinqun Ye changed to the first author of this paper.

Written confirmation:

*Jinqun Ye*

*Yun Zhong*

*Yifan Song*

*Yurong Lou*
